# Supplementary material for: Rate of Adoption and Determinants of Climates Smartagriculture Adoption Among Small Holder Farmers: The Case of Welmera Woreda, Oromia Region, Ethiopia
Source: Preprints.org preprint supplement (doi:10.20944/preprints202305.0110.v2), 2023-05-12
Supplement: Supplementary file 1 [file supplementary]

**Annex**


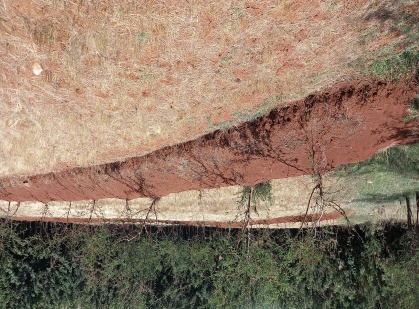

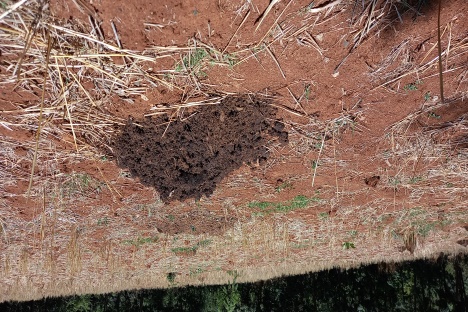
Pictorial presentation of some of CSA techniques being used by farmers in the research area (taken during survey data collection).

Compost spread on farmers’ field

Conservation agriculture on

Farmers’ field


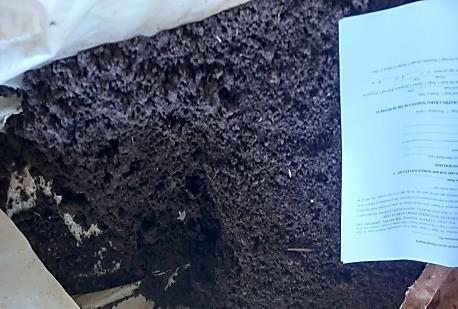


**Vermi compost being used by farmers**
